# Supplementary material for: Advances in applied homeostatic modelling of the relationship between thyrotropin and free thyroxine
Source: PLoS One. 2017 Nov 20;12(11):e0187232. doi: 10.1371/journal.pone.0187232 (PMC5695809; doi:10.1371/journal.pone.0187232)
Supplement: S1 Table — (XLSX) [file pone.0187232.s001.xlsx]

## Sheet: sheet1
no	group	FT4	TSH	phi
1	1	15.7	6.6	NA
2	1	15.1	5.1	NA
3	1	13.4	4.48	NA
4	1	17.2	4.31	NA
5	1	16.5	3.89	NA
6	1	11.8	3.83	NA
7	1	14.7	3.75	NA
8	1	12.3	3.71	NA
9	1	13.9	3.66	NA
10	1	13.3	3.57	NA
11	1	10.9	3.56	NA
12	1	12	3.49	NA
13	1	17.2	3.48	NA
14	1	13	3.47	NA
15	1	14.7	3.41	NA
16	1	15.1	3.29	NA
17	1	12.7	3.28	NA
18	1	12.9	3.21	NA
19	1	11.6	3.19	NA
20	1	15.3	3.17	NA
21	1	12.9	3.07	NA
22	1	13.3	3.01	NA
23	1	12.7	2.96	NA
24	1	14.9	2.91	NA
25	1	13.7	2.9	NA
26	1	10.8	2.87	NA
27	1	14.7	2.86	NA
28	1	13.8	2.83	NA
29	1	11.6	2.82	NA
30	1	13.9	2.79	NA
31	1	14.7	2.76	NA
32	1	19.1	2.68	NA
33	1	15	2.67	NA
34	1	12.6	2.67	NA
35	1	12.4	2.66	NA
36	1	11.6	2.48	NA
37	1	15.6	2.46	NA
38	1	13.2	2.46	NA
39	1	13.2	2.43	NA
40	1	14.3	2.42	NA
41	1	12.6	2.42	NA
42	1	13.9	2.41	NA
43	1	13.1	2.41	NA
44	1	12.9	2.4	NA
45	1	15.4	2.4	NA
46	1	13.3	2.39	NA
47	1	16.1	2.33	NA
48	1	16.3	2.3	NA
49	1	15	2.29	NA
50	1	12.6	2.27	NA
51	1	12.7	2.24	NA
52	1	14.5	2.24	NA
53	1	15.8	2.24	NA
54	1	12.2	2.22	NA
55	1	16.3	2.18	NA
56	1	13.1	2.16	NA
57	1	14.1	2.15	NA
58	1	14.8	2.15	NA
59	1	13.9	2.14	NA
60	1	14.4	2.14	NA
61	1	14.1	2.1	NA
62	1	14.5	2.1	NA
63	1	16.7	2.09	NA
64	1	17.4	2.08	NA
65	1	16	2.07	NA
66	1	13.6	2.07	NA
67	1	15.1	2.06	NA
68	1	11.4	2.05	NA
69	1	13	2.04	NA
70	1	12.4	2.04	NA
71	1	14.5	2.03	NA
72	1	13.2	2.01	NA
73	1	12.2	2	NA
74	1	13.4	1.99	NA
75	1	11.9	1.99	NA
76	1	14.5	1.99	NA
77	1	16	1.95	NA
78	1	13.6	1.95	NA
79	1	14.6	1.95	NA
80	1	13.3	1.95	NA
81	1	15.2	1.95	NA
82	1	17.3	1.95	NA
83	1	15.5	1.89	NA
84	1	13.3	1.89	NA
85	1	12.2	1.88	NA
86	1	16.5	1.86	NA
87	1	17.1	1.86	NA
88	1	13.5	1.85	NA
89	1	15.9	1.85	NA
90	1	16.8	1.84	NA
91	1	14.7	1.84	NA
92	1	14	1.83	NA
93	1	14.5	1.8	NA
94	1	11.8	1.79	NA
95	1	12.4	1.78	NA
96	1	13.1	1.78	NA
97	1	14.6	1.77	NA
98	1	12.2	1.77	NA
99	1	11.8	1.76	NA
100	1	14.5	1.76	NA
101	1	13	1.76	NA
102	1	12.6	1.76	NA
103	1	13.4	1.74	NA
104	1	14.8	1.74	NA
105	1	14.4	1.73	NA
106	1	14.9	1.72	NA
107	1	14.9	1.71	NA
108	1	16.3	1.71	NA
109	1	16.1	1.7	NA
110	1	13.2	1.7	NA
111	1	13.6	1.7	NA
112	1	14.1	1.69	NA
113	1	13.6	1.69	NA
114	1	13.9	1.69	NA
115	1	15.5	1.68	NA
116	1	13.9	1.64	NA
117	1	15.8	1.64	NA
118	1	13.3	1.64	NA
119	1	14.7	1.64	NA
120	1	14.7	1.63	NA
121	1	14.8	1.61	NA
122	1	11.4	1.61	NA
123	1	12.9	1.61	NA
124	1	17.4	1.59	NA
125	1	12.5	1.58	NA
126	1	15.7	1.58	NA
127	1	14.9	1.56	NA
128	1	12.5	1.55	NA
129	1	13.5	1.55	NA
130	1	11.1	1.55	NA
131	1	12.2	1.54	NA
132	1	13.8	1.53	NA
133	1	13.8	1.52	NA
134	1	12.5	1.5	NA
135	1	12.3	1.48	NA
136	1	15.6	1.47	NA
137	1	15.8	1.47	NA
138	1	13.7	1.46	NA
139	1	11.8	1.45	NA
140	1	19.1	1.44	NA
141	1	13.3	1.44	NA
142	1	15.7	1.43	NA
143	1	12.1	1.41	NA
144	1	14.7	1.39	NA
145	1	15.5	1.38	NA
146	1	12.2	1.38	NA
147	1	15.4	1.38	NA
148	1	13.7	1.35	NA
149	1	12.1	1.34	NA
150	1	15.2	1.34	NA
151	1	13.5	1.33	NA
152	1	13.2	1.33	NA
153	1	12.8	1.3	NA
154	1	12.1	1.29	NA
155	1	14.2	1.28	NA
156	1	13.4	1.27	NA
157	1	13.8	1.27	NA
158	1	15.3	1.26	NA
159	1	16.5	1.26	NA
160	1	15.5	1.23	NA
161	1	12.8	1.21	NA
162	1	15.7	1.21	NA
163	1	13.9	1.2	NA
164	1	15.4	1.2	NA
165	1	12.8	1.2	NA
166	1	14.1	1.2	NA
167	1	14.7	1.2	NA
168	1	13.9	1.19	NA
169	1	13.8	1.19	NA
170	1	15.8	1.19	NA
171	1	18.3	1.19	NA
172	1	13.5	1.19	NA
173	1	15.7	1.18	NA
174	1	15.7	1.18	NA
175	1	14.1	1.17	NA
176	1	13.3	1.15	NA
177	1	14.1	1.15	NA
178	1	13.6	1.14	NA
179	1	17.5	1.14	NA
180	1	14.6	1.13	NA
181	1	12.6	1.13	NA
182	1	14.7	1.12	NA
183	1	10.9	1.1	NA
184	1	15.7	1.1	NA
185	1	15.2	1.09	NA
186	1	17.6	1.09	NA
187	1	14.6	1.09	NA
188	1	16.4	1.08	NA
189	1	13.9	1.07	NA
190	1	14	1.05	NA
191	1	12.9	1.04	NA
192	1	14.3	1.04	NA
193	1	13.1	1.03	NA
194	1	14.6	1.03	NA
195	1	15.7	1.03	NA
196	1	16.3	1.01	NA
197	1	14	1.01	NA
198	1	15.9	1.01	NA
199	1	12.7	1.01	NA
200	1	15.4	1	NA
201	1	15.4	1	NA
202	1	13.4	0.99	NA
203	1	12.9	0.98	NA
204	1	15.2	0.98	NA
205	1	14.2	0.97	NA
206	1	12.6	0.97	NA
207	1	11.5	0.97	NA
208	1	13.8	0.95	NA
209	1	10.8	0.94	NA
210	1	13.4	0.94	NA
211	1	14.2	0.92	NA
212	1	13.6	0.92	NA
213	1	15.8	0.91	NA
214	1	14.9	0.9	NA
215	1	15	0.89	NA
216	1	15.3	0.89	NA
217	1	10.8	0.89	NA
218	1	14.8	0.89	NA
219	1	12.4	0.88	NA
220	1	14.6	0.87	NA
221	1	16	0.87	NA
222	1	16	0.86	NA
223	1	14.7	0.86	NA
224	1	13.8	0.86	NA
225	1	16.3	0.85	NA
226	1	12.7	0.84	NA
227	1	12.6	0.82	NA
228	1	13.2	0.81	NA
229	1	15.4	0.81	NA
230	1	10.9	0.8	NA
231	1	15.9	0.8	NA
232	1	11.5	0.79	NA
233	1	14.8	0.79	NA
234	1	15.4	0.79	NA
235	1	15.7	0.77	NA
236	1	15.4	0.76	NA
237	1	12.9	0.76	NA
238	1	12.7	0.76	NA
239	1	13.2	0.75	NA
240	1	14.5	0.75	NA
241	1	16.5	0.75	NA
242	1	12.5	0.74	NA
243	1	12.2	0.74	NA
244	1	13.4	0.74	NA
245	1	16.1	0.72	NA
246	1	15.3	0.72	NA
247	1	15	0.71	NA
248	1	16.4	0.71	NA
249	1	17.6	0.7	NA
250	1	15.1	0.7	NA
251	1	13.4	0.69	NA
252	1	16.7	0.69	NA
253	1	13.6	0.69	NA
254	1	13	0.68	NA
255	1	12.6	0.67	NA
256	1	15.1	0.67	NA
257	1	15.1	0.64	NA
258	1	14.9	0.6	NA
259	1	13	0.59	NA
260	1	15.4	0.49	NA
261	1	15.9	0.48	NA
262	1	14.4	0.47	NA
263	1	14.4	0.47	NA
264	1	14.5	0.47	NA
265	1	15.9	0.47	NA
266	1	16.6	0.46	NA
267	1	14.9	0.46	NA
268	1	14	0.45	NA
269	2	20.4	0.01	NA
270	2	20.6	0.01	NA
271	2	21.7	0.01	NA
272	2	25.9	0.01	NA
273	2	29.5	0.01	NA
274	2	19.5	0.02	NA
275	2	22	0.02	NA
276	2	20.3	0.03	NA
277	2	23.7	0.03	NA
278	2	30.8	0.03	NA
279	2	22.7	0.05	NA
280	2	18.2	0.08	NA
281	2	18.1	0.1	NA
282	2	19.2	0.11	NA
283	2	19.9	0.11	NA
284	2	20.9	0.11	NA
285	2	18.4	0.12	NA
286	2	19	0.12	NA
287	2	23.3	0.12	NA
288	2	20	0.13	NA
289	2	17.3	0.14	NA
290	2	20.4	0.14	NA
291	2	22.3	0.17	NA
292	2	19.7	0.18	NA
293	2	16.9	0.19	NA
294	2	14.1	0.21	NA
295	2	19.3	0.21	NA
296	2	18.6	0.22	NA
297	2	16.1	0.24	NA
298	2	17	0.24	NA
299	2	19.6	0.24	NA
300	2	16.2	0.25	NA
301	2	18.9	0.25	NA
302	2	17.7	0.28	NA
303	2	14.9	0.3	NA
304	2	16.3	0.3	NA
305	2	19.7	0.3	NA
306	2	17.9	0.31	NA
307	2	14.8	0.34	NA
308	2	15.9	0.34	NA
309	2	16.7	0.34	NA
310	2	21.2	0.34	NA
311	2	19.7	0.38	NA
312	2	15	0.39	NA
313	2	15	0.4	NA
314	2	16.4	0.4	NA
315	2	16	0.41	NA
316	2	17	0.42	NA
317	2	17.3	0.42	NA
318	2	19.8	0.43	NA
319	2	23.9	0.43	NA
320	2	18.9	0.44	NA
321	2	16.2	0.45	NA
322	2	11.5	0.47	NA
323	2	16.4	0.47	NA
324	2	20.6	0.48	NA
325	2	22.8	0.48	NA
326	2	25.8	0.48	NA
327	2	17.2	0.5	NA
328	2	20	0.5	NA
329	2	15.7	0.52	NA
330	2	15.5	0.53	NA
331	2	17.6	0.53	NA
332	2	23.9	0.53	NA
333	2	17.6	0.56	NA
334	2	22.1	0.58	NA
335	2	15.1	0.59	NA
336	2	19.9	0.6	NA
337	2	20	0.61	NA
338	2	17.6	0.64	NA
339	2	18.7	0.64	NA
340	2	16.6	0.65	NA
341	2	18.1	0.65	NA
342	2	13.7	0.67	NA
343	2	17.5	0.68	NA
344	2	18.8	0.7	NA
345	2	21.9	0.7	NA
346	2	15.1	0.71	NA
347	2	17.1	0.72	NA
348	2	17.5	0.72	NA
349	2	17.1	0.73	NA
350	2	14.2	0.74	NA
351	2	17.2	0.74	NA
352	2	18.9	0.74	NA
353	2	16	0.75	NA
354	2	20.4	0.75	NA
355	2	15.3	0.76	NA
356	2	15.7	0.78	NA
357	2	17.7	0.78	NA
358	2	16.5	0.79	NA
359	2	12.2	0.8	NA
360	2	14.5	0.8	NA
361	2	18.7	0.83	NA
362	2	17.5	0.85	NA
363	2	22	0.87	NA
364	2	18.4	0.88	NA
365	2	19	0.9	NA
366	2	17.5	0.91	NA
367	2	20.1	0.91	NA
368	2	15.7	0.92	NA
369	2	15.9	0.93	NA
370	2	16.1	0.93	NA
371	2	14.4	0.94	NA
372	2	20	0.94	NA
373	2	16.3	0.95	NA
374	2	18.2	0.95	NA
375	2	18.5	0.96	NA
376	2	16.5	0.97	NA
377	2	17.3	0.97	NA
378	2	17	0.99	NA
379	2	14.9	1	NA
380	2	16.2	1	NA
381	2	19.1	1	NA
382	2	21.6	1.01	NA
383	2	20.3	1.02	NA
384	2	15.8	1.07	NA
385	2	13.4	1.08	NA
386	2	16.1	1.09	NA
387	2	23.4	1.1	NA
388	2	15	1.12	NA
389	2	16.3	1.12	NA
390	2	15.4	1.14	NA
391	2	15.7	1.15	NA
392	2	18.8	1.16	NA
393	2	21.6	1.16	NA
394	2	14	1.23	NA
395	2	19.1	1.23	NA
396	2	14.4	1.24	NA
397	2	16.1	1.25	NA
398	2	15.1	1.26	NA
399	2	24	1.28	NA
400	2	16.4	1.32	NA
401	2	14.5	1.34	NA
402	2	17.8	1.36	NA
403	2	14.8	1.38	NA
404	2	12.6	1.44	NA
405	2	14.8	1.44	NA
406	2	14.2	1.46	NA
407	2	22.5	1.46	NA
408	2	13.1	1.47	NA
409	2	18	1.47	NA
410	2	15.1	1.49	NA
411	2	19.5	1.51	NA
412	2	15.9	1.55	NA
413	2	16.2	1.6	NA
414	2	18.8	1.6	NA
415	2	15.2	1.61	NA
416	2	19.5	1.61	NA
417	2	17	1.64	NA
418	2	15.9	1.68	NA
419	2	15.2	1.7	NA
420	2	19.3	1.7	NA
421	2	13.6	1.75	NA
422	2	15.7	1.76	NA
423	2	16.9	1.76	NA
424	2	19	1.79	NA
425	2	16.9	1.8	NA
426	2	18.6	1.83	NA
427	2	17.5	1.84	NA
428	2	20.9	1.86	NA
429	2	18.5	1.88	NA
430	2	17.2	1.89	NA
431	2	14	1.96	NA
432	2	15.9	1.97	NA
433	2	16.9	1.98	NA
434	2	18	1.98	NA
435	2	17.2	2	NA
436	2	18.6	2	NA
437	2	14.4	2.01	NA
438	2	13.1	2.02	NA
439	2	15.5	2.04	NA
440	2	19.4	2.04	NA
441	2	15	2.05	NA
442	2	17.9	2.07	NA
443	2	20.9	2.08	NA
444	2	17.2	2.1	NA
445	2	13.5	2.12	NA
446	2	15.9	2.14	NA
447	2	14.7	2.18	NA
448	2	18.2	2.2	NA
449	2	16	2.25	NA
450	2	13.8	2.27	NA
451	2	17.5	2.29	NA
452	2	18.5	2.29	NA
453	2	22.4	2.31	NA
454	2	15.3	2.37	NA
455	2	14.3	2.46	NA
456	2	18.4	2.48	NA
457	2	14	2.52	NA
458	2	15	2.7	NA
459	2	16.6	2.75	NA
460	2	14.2	2.94	NA
461	2	15.2	2.97	NA
462	2	14.9	3.03	NA
463	2	17.4	3.04	NA
464	2	13.8	3.07	NA
465	2	16.8	3.1	NA
466	2	12.9	3.11	NA
467	2	13.5	3.12	NA
468	2	23.3	3.18	NA
469	2	15.8	3.34	NA
470	2	17.5	3.47	NA
471	2	14.8	3.49	NA
472	2	11.9	3.5	NA
473	2	11.3	3.7	NA
474	2	16.1	3.79	NA
475	2	17.6	3.79	NA
476	3	19.4	0.13	1.17413
477	3	16.5	0.78	0.456537
478	3	16.2	1.6	0.199682
479	3	25.2	3.45	0.145386
480	3	29.7	0.13	0.187121
481	3	27.2	0.6	0.262474
482	3	22.9	1.86	0.217527
483	3	16	3.73	2.76132
484	3	32.3	0.78	0.229725
485	3	19.6	3.27	0.508414
486	3	30.5	0.13	0.274913
487	3	23.1	0.25	0.252095
488	3	28.9	1.04	0.14384
489	3	22.2	1.44	0.223833
490	3	20.9	0.81	0.532866
491	3	28.7	0.2	0.139266
492	3	25.9	0.71	0.091211
493	3	28.1	0.6	0.182319
494	3	22.6	3.74	0.425901
495	3	22.1	0.48	0.268383
496	3	17.6	2.06	0.297089
497	3	17.7	3.69	0.97598
498	3	30	1.93	0.363448
499	3	15.9	1.59	0.327814
500	3	28.3	1.49	0.373672
501	3	19.8	1.1	0.486792
502	3	22	1.17	0.27411
503	3	14.9	0.84	0.317682
504	3	25.4	0.48	0.398128
505	3	20.3	3.37	0.570365
506	3	25.9	0.13	0.191652
507	3	22	3.74	0.257587
508	3	18.6	0.55	0.796326
509	3	20.2	2.95	0.409334
510	3	23.3	0.46	0.285342
511	3	28.2	0.12	0.0522196
512	3	18.8	3.11	0.876002
513	3	35.6	0.3	0.0270117
514	3	22.7	0.29	0.469841
515	3	30.8	0.15	0.226186
516	3	17.4	2.69	0.500804
517	3	21.6	0.65	0.984859
518	3	18.2	1.82	0.870936
519	3	28.5	1.19	0.192035
520	3	21.3	0.17	0.56775
521	3	23.8	1.85	0.318688
522	3	25.4	0.19	0.240702
523	3	24.1	1.36	0.411551
524	3	23.4	0.12	0.304769
525	3	24.2	0.4	0.184581
526	3	20.7	0.46	0.271357
527	3	19.6	0.65	0.489139
528	3	21.6	0.13	0.325264
529	3	22.8	1.84	0.358524
530	3	29	1.1	0.247196
531	3	26.3	0.58	0.136067
532	3	24.7	0.26	0.171258
533	3	16.4	3.44	0.250799
534	3	15.4	3.88	1.93117
535	3	18.7	2.96	0.788587
536	3	24.6	0.31	0.216839
537	3	26.9	0.11	0.253364
538	3	20.4	2.35	1.39168
539	3	26.3	0.28	0.224163
